# Supplementary material for: Results From the United States Chronic Thromboembolic Pulmonary Hypertension Registry: Enrollment Characteristics and 1-Year Follow-up
Source: PubMed Central journal article supplement (PMC8628169; doi:10.1016/j.chest.2021.05.052), 2021-06-04
Supplement: mmc1.pdf [file mmc1.pdf]

# Results From the United States Chronic Thromboembolic Pulmonary Hypertension Registry

## Enrollment Characteristics and 1-Year Follow-up

*Kim M. Kerr, MD, FCCP; C. Greg Elliott, MD; Kelly Chin, MD; Raymond L. Benza, MD; Richard N. Channick, MD; R. Duane Davis, MD; Feng He, PhD; Andrea LaCroix, PhD; Michael M. Madani, MD; Vallerie V. McLaughlin, MD; Myung Park, MD; Ivan M. Robbins, MD; Victor F. Tapson, MD; Jeffrey R. Terry, MBA; Victor J. Test, MD; Sonia Jain, PhD; and William R. Auger, MD*

CHEST 2021; 160(5):1822-1831

*Online supplements are not copyedited prior to posting and the author(s) take full responsibility for the accuracy of all data.*

**e-Table 1: Baseline Characteristics Associated with Technically Operable Patients Not Undergoing Surgery**

|                                        | OR   | 95% CI    | P Value and Significance |
|----------------------------------------|------|-----------|--------------------------|
| Older age                              | 0.96 | 0.95-0.98 | <0.0001 <sup>a</sup>     |
| Gender                                 | 1.09 | 0.69-1.71 | 0.706                    |
| Non-Hispanic black race <sup>b</sup>   | 1.67 | 1.02-2.74 | 0.043 <sup>a</sup>       |
| Chronic obstructive pulmonary disease  | 0.45 | 0.26-0.78 | 0.004 <sup>a</sup>       |
| Left ventricular diastolic dysfunction | 0.27 | 0.10-0.75 | 0.012 <sup>a</sup>       |
| Left ventricular systolic dysfunction  | 0.15 | 0.03-0.76 | 0.022 <sup>a</sup>       |
| Prolonged hospitalization <sup>c</sup> | 0.50 | 0.28-0.90 | 0.021 <sup>a</sup>       |
| History of leukemia or lymphoma        | 0.23 | 0.06-0.81 | 0.023 <sup>a</sup>       |
| History of solid organ cancer          | 0.53 | 0.25-1.11 | 0.092                    |
| History of any cancer <sup>d</sup>     | 0.46 | 0.24-0.90 | 0.024 <sup>a</sup>       |
| Obesity, BMI > 30                      | 1.00 | 0.64-1.56 | 0.989                    |
| Extreme obesity, BMI > 40              | 1.09 | 0.58-2.05 | 0.787                    |
| PH-targeted therapy at enrollment      | 0.65 | 0.41-1.02 | 0.061                    |

OR = odds ratio, CI = confidence interval

<sup>a</sup>Univariate logistic regression analysis comparing Operable/No surgery patients to Operated patients. P < 0.05 statistically significant

<sup>b</sup>Non-Hispanic black race compared to non-Hispanic white race

<sup>c</sup>Prolonged hospitalization (> 2 weeks within 5 years of symptom onset)

<sup>d</sup>Excluding non-melanoma skin cancer

**e-Table 2: Acute Thromboembolic History**

|                     | Total cohort<br>N=750 | Operated<br>n=566 | Inoperable<br>n=96 | Operable/no<br>surgery n=88 | P Value<br>and Significance |
|---------------------|-----------------------|-------------------|--------------------|-----------------------------|-----------------------------|
| Acute PE n (%)      | 659 (87.9%)           | 505 (89.2%)       | 80 (83.3%)         | 74 (84.1%)                  | 0.125                       |
| Acute DVT           | 371 (49.5%)           | 297 (52.5%)       | 37 (38.5%)         | 37 (42.1%)                  | 0.014 <sup>ab</sup>         |
| Acute PE + DVT      | 347 (46.3%)           | 280 (49.5%)       | 32 (33.3%)         | 35 (39.8%)                  | 0.006 <sup>ab</sup>         |
| Acute PE, no DVT    | 312 (41.6%)           | 225 (39.8%)       | 48 (50.0%)         | 39 (44.3%)                  | 0.151                       |
| Acute DVT, no PE    | 24 (3.2%)             | 17 (3.0%)         | 5 (5.2%)           | 2 (2.3%)                    | 0.437                       |
| No acute DVT or PE  | 67 (8.9%)             | 44 (7.8%)         | 11 (11.5%)         | 12 (13.6%)                  | 0.114                       |
| Upper extremity DVT | 12 (1.6%)             | 9 (1.6%)          | 2 (2.1%)           | 1 (1.1%)                    | 0.880                       |
| Recurrent PE        | 319 (48.5%)           | 249 (49.4%)       | 33 (41.3%)         | 37 (50.0%)                  | 0.386                       |

PE = pulmonary embolism, DVT = deep venous thrombosis

Percentage of recurrent PE Based on number in cohort with history of acute PE

<sup>a</sup>Comparison among three groups,  $P < 0.05$  statistically significant

<sup>b</sup>Between group (Inoperable vs Operated) comparisons,  $P < 0.017$  statistically significant

**e-Table 3: Co-morbidities**

|                              | Total cohort<br>N=750 | Operated<br>n=566 | Inoperable<br>n=96 | Operable/no<br>surgery<br>n=88 | P Value<br>and Significance |
|------------------------------|-----------------------|-------------------|--------------------|--------------------------------|-----------------------------|
| Obesity BMI > 30             | 369 (49.2%)           | 289 (51.1%)       | 35 (36.5%)         | 45 (51.1%)                     | 0.027 <sup>ab</sup>         |
| Extreme obesity BMI >40      | 108 (14.4%)           | 90 (15.9%)        | 5 (5.2%)           | 13 (14.8%)                     | 0.013 <sup>ab</sup>         |
| COPD                         | 114 (15.2%)           | 70 (12.4%)        | 23 (24.0%)         | 21 (23.9%)                     | <0.001 <sup>abc</sup>       |
| LV systolic dysfunction      | 7 (0.9%)              | 3 (0.5%)          | 1 (1.0%)           | 3 (3.4%)                       | 0.030 <sup>a</sup>          |
| LV diastolic dysfunction     | 20 (2.7%)             | 11 (1.9%)         | 3 (3.1%)           | 6 (6.8%)                       | 0.032 <sup>a</sup>          |
| Congenital heart dis         | 22 (2.9%)             | 14 (2.5%)         | 3 (3.1%)           | 5 (5.7%)                       | 0.238                       |
| Valvular heart disease       | 20 (2.7%)             | 13 (2.3%)         | 2 (2.1%)           | 5 (5.7%)                       | 0.197                       |
| Systemic hypertension        | 271 (36.1%)           | 202 (35.7%)       | 35 (36.5%)         | 34 (38.6%)                     | 0.857                       |
| Coronary artery disease      | 82 (10.9%)            | 54 (9.5%)         | 13 (13.5%)         | 15 (17.1%)                     | 0.069                       |
| Atrial fibrillation          | 53 (7.1%)             | 40 (7.1%)         | 5 (5.2%)           | 8 (9.1%)                       | 0.581                       |
| History of stroke/TIA        | 41 (5.5%)             | 29 (5.1%)         | 7 (7.3%)           | 5 (5.7%)                       | 0.585                       |
| Interstitial lung disease    | 12 (1.6%)             | 8 (1.4%)          | 2 (2.1%)           | 2 (2.3%)                       | 0.685                       |
| Sleep disorder breathing     | 209 (27.9%)           | 164 (29.0%)       | 21 (21.9%)         | 24 (27.3%)                     | 0.362                       |
| Asthma                       | 92 (12.3%)            | 76 (13.4%)        | 8 (8.3%)           | 8 (9.1%)                       | 0.269                       |
| Diabetes                     | 113 (15.1%)           | 77 (13.6%)        | 17 (17.7%)         | 19 (21.6%)                     | 0.100                       |
| Scleroderma                  | 2 (0.3%)              | 1 (0.2%)          | 1 (1.0%)           | 0 (0.0%)                       | 0.431                       |
| Systemic lupus erythematosus | 17 (2.3%)             | 15 (2.7%)         | 1 (1.0%)           | 1 (1.1%)                       | 0.644                       |
| Portal hypertension          | 6 (0.8%)              | 4 (0.7%)          | 1 (1.0%)           | 1 (1.1%)                       | 0.455                       |
| Inflammatory bowel dis       | 11 (1.5%)             | 7 (1.2%)          | 3 (3.1%)           | 1 (1.1%)                       | 0.233                       |
| Renal disease                | 10 (1.3%)             | 6 (1.1%)          | 1 (1.0%)           | 3 (3.4%)                       | 0.147                       |
| Toxins/drugs                 | 36 (4.8%)             | 28 (5.0%)         | 4 (4.2%)           | 4 (4.6%)                       | >0.999                      |

Renal disease = End stage renal disease on dialysis or nephrotic syndrome

Toxins/drugs = amphetamines, amphetamine like drugs, cocaine, fenfluramine, or dexfenfluramine

<sup>a</sup>Comparison among three groups,  $P < 0.05$  statistically significant

<sup>b</sup>Between group (Inoperable vs Operated) comparisons,  $P < 0.017$  statistically significant

<sup>c</sup>Between group (Operable/No surgery vs Operated) comparisons,  $P < 0.017$  statistically significant

**e-Table 4: Co-morbidities Associated with CTEPH and Venous Thromboembolism**

|                                      | Total cohort<br>N=750 | Operated<br>n=566    | Inoperable<br>n=96 | Operable/no<br>surgery<br>n=88 | P Value<br>and Significance |
|--------------------------------------|-----------------------|----------------------|--------------------|--------------------------------|-----------------------------|
| H/o VTE in family member             | 17.7%                 | 19.3%                | 13.6%              | 11.7%                          | 0.169                       |
| Thrombophilia (any)<br>N tested      | 209 (37.9%)<br>n=552  | 175 (39.2%)<br>n=446 | 19 (33.3%)<br>n=57 | 15 (30.6%)<br>n=49             | 0.400                       |
| LAC/APA<br>N tested                  | 120 (23.0%)<br>n=522  | 103 (24.3%)<br>n=424 | 9 (17.3%)<br>n=52  | 8 (17.4%)<br>n=46              | 0.378                       |
| Non Type O Blood Group±<br>N tested  | 372 (73.8%)<br>n=504  | 323 (74.4%)<br>n=434 | 23 (56.1%)<br>n=41 | 26 (89.7%)<br>n=29             | 0.006 <sup>abc</sup>        |
| Venous insufficiency                 | 19 (2.5%)             | 15 (2.7%)            | 4 (4.2%)           | 0 (0.0%)                       | 0.178                       |
| Post thrombotic syndrome             | 53 (7.1%)             | 39 (6.9%)            | 9 (9.4%)           | 5 (5.7%)                       | 0.563                       |
| H/o solid organ cancer               | 58 (7.7%)             | 36 (6.4%)            | 12 (12.5%)         | 10 (11.4%)                     | 0.042 <sup>a</sup>          |
| H/o any cancer                       | 69 (9.2%)             | 42 (7.4%)            | 14 (14.6%)         | 13 (14.8%)                     | 0.013 <sup>a</sup>          |
| H/o leukemia/lymphoma                | 12 (1.6%)             | 6 (1.1%)             | 2 (2.1%)           | 4 (4.6%)                       | 0.034 <sup>a</sup>          |
| H/o myeloproliferative disease       | 19 (2.5%)             | 11 (1.9%)            | 6 (6.3%)           | 2 (2.3%)                       | 0.055                       |
| Splenectomy                          | 46 (6.1%)             | 29 (5.1%)            | 10 (10.4%)         | 7 (8.0%)                       | 0.094                       |
| Prolonged hospitalization            | 99 (13.2%)            | 65 (11.5%)           | 16 (16.7%)         | 18 (20.5%)                     | 0.040 <sup>a</sup>          |
| Major orthopedic surgery             | 136 (18.1%)           | 96 (17.0%)           | 23 (24.0%)         | 17 (19.3%)                     | 0.231                       |
| Central venous catheter<br>placement | 29 (3.9%)             | 18 (3.2%)            | 7 (7.3%)           | 4 (4.6%)                       | 0.143                       |
| Chronic pacemaker implantation       | 12 (1.6%)             | 10 (1.8%)            | 1 (1.0%)           | 1 (1.1%)                       | >0.999                      |
| Ventriculoatrial shunt               | 2 (0.3%)              | 2 (0.4%)             | 0 (0.0%)           | 0 (0.0%)                       | >0.999                      |
| Hypothyroid on supplements           | 83 (11.1%)            | 63 (11.1%)           | 7 (7.3%)           | 13 (14.8%)                     | 0.046 <sup>a</sup>          |
| Chronic infectious disease           | 4 (0.5%)              | 3 (0.5%)             | 0 (0%)             | 1 (1.1%)                       | 0.456                       |
| Tobacco use (any)                    | 302 (40.3%)           | 219 (38.7%)          | 45 (46.9%)         | 38 (43.2%)                     | 0.264                       |

LAC/APA= lupus anticoagulant, antiphospholipid antibodies

Percentage thrombophilia and LAC base upon number of subjects tested in each cohort

Any cancer = Any solid organ cancer, melanoma, lymphoma or leukemia

Chronic infectious disease = HIV or osteomyelitis

<sup>a</sup>Comparison among three groups,  $P < 0.05$  statistically significant

<sup>b</sup>Between group (Inoperable vs Operable/No surgery) comparisons,  $P < 0.017$  statistically significant

<sup>c</sup>Between group (Inoperable vs Operated) comparisons,  $P < 0.017$  statistically significant

**e-Table 5: Pre and Early Post-operative Hemodynamics**

|                                      | Baseline                | Post Operative        | P Value and Significance |
|--------------------------------------|-------------------------|-----------------------|--------------------------|
| RAP (mmHg)                           | 9 [6-13] (533)          | 9 [6-12] (500)        | 0.0028 <sup>a</sup>      |
| mPAP (mmHg)                          | 44 [36-52] (566)        | 24 [20-30] (554)      | < 0.001 <sup>a</sup>     |
| PCWP (mmHg)                          | 12 [8-15] (551)         | Not measured          |                          |
| Cardiac output (L/min)               | 4.57 [3.6-5.6] (556)    | 5.5 [4.6-6.6] (520)   | <0.001 <sup>a</sup>      |
| Cardiac index(L/min/m <sup>2</sup> ) | 2.2 [1.8-2.7] (542)     | 2.7 [2.4-3.1] (510)   | < 0.001 <sup>a</sup>     |
| PVR (WU)                             | 6.9 [4.73-10.29] (545)  | 2.6 [1.92-3.68] (465) | < 0.001 <sup>a</sup>     |
| TPR (WU)                             | 9.44 [7.12-13.32] (556) | 4.4 [3.33-5.83] (515) | < 0.001 <sup>a</sup>     |

All values expressed as median [first - third quartiles] (number of subjects)

RAP = right atrial pressure, mPAP = mean pulmonary artery pressure, PCWP = pulmonary capillary wedge pressure, PVR = pulmonary vascular resistance, TPR = total pulmonary resistance

Post-operative PVR calculated substituting the RAP for the PCWP

Thermodilution values used for reporting cardiac output and index whenever available, otherwise Fick value reported

Wilcoxon Signed-Rank Test is performed to compare between baseline and post-operative

<sup>a</sup>P < 0.05 statistically significant

### e-Appendix 1: US-CTEPH-R Study Sites and Principal Investigators

| Site ID | Institution Name                     | Principal Investigator       |
|---------|--------------------------------------|------------------------------|
| 1       | University of California San Diego   | Kim Kerr, MD                 |
| 2       | Cedars-Sinai, Los Angeles            | Victor Tapson, MD            |
| 3       | Cleveland Clinic                     | Gustavo Heresi, MD           |
| 4       | Massachusetts General Hospital       | Josanna Rodriguez-Lopez, MD  |
| 5       | Columbia University Medical Center   | Erika Berman-Rosenzweig, MD  |
| 6       | Louisiana State University           | Matthew Lammi, MD            |
| 7       | University of Chicago                | Remzi Bag, MD                |
| 8       | University of Maryland               | Gautam Ramani, MD            |
| 9       | University of Pennsylvania           | Harold Palevsky, MD          |
| 10      | University of Kansas                 | Timothy Williamson, MD       |
| 11      | Stanford University                  | Roham Zamanian, MD           |
| 12      | University of Colorado, Denver       | Todd Bull, MD                |
| 13      | Mayo Clinic, Jacksonville            | Charles Burger, MD           |
| 14      | Emory University                     | Micah Fisher, MD             |
| 15      | Mayo Clinic, Rochester               | Michael Krowka, MD           |
| 16      | Allegheny Health                     | Manreet Kanwar, MD           |
| 17      | University of Michigan               | Vallerie McLaughlin, MD      |
| 18      | Virginia Commonwealth University     | Daniel Grinnan, MD           |
| 19      | Washington University, St. Louis     | Murali Chakinala, MD         |
| 20      | University of Washington, Seattle    | Peter Leary, MD, PhD         |
| 21      | University of Texas, Southwestern    | Kelly Chin, MD               |
| 22      | University of Florida                | Hassan Alnuaimat, MD         |
| 23      | Brigham & Women's Hospital           | Aaron Waxman, MD             |
| 24      | Duke University Medical Center       | Sudarshan Rajagopal, MD, PhD |
| 25      | Vanderbilt University                | Ivan Robbins, MD             |
| 26      | Aurora Health Care                   | Dianne Zwicke, MD            |
| 27      | University of California Los Angeles | Rajan Saggar, MD             |
| 28      | Intermountain Medical Center         | Lynnette Brown, MD           |
| 29      | Temple University                    | Paul Forfia, MD              |
| 30      | Houston Methodist Hospital           | Zeenat Safdar, MD            |

### e-Appendix 2: Members of the Radiologic Adjudication Committee

William R. Auger, MD, Temple University  
 Richard N. Channick, MD, University of California Los Angeles  
 Kim M. Kerr, MD, University of California San Diego  
 Michael M. Madani, MD, University of California San Diego  
 Ivan M. Robbins, MD, Vanderbilt University  
 Victor J. Test, MD, Texas Tech University

**e-Appendix 3: Subject State of Residence (using first 3 digits of subject ZIP code)**

| <b>Subject State of Residence</b> | <b>Number Enrolled<br/>(% subjects), N = 746</b> |
|-----------------------------------|--------------------------------------------------|
| Alabama                           | 1 (0.1)                                          |
| Alaska                            | 1 (0.1)                                          |
| Arizona                           | 8 (1.1)                                          |
| Arkansas                          | 8 (1.1)                                          |
| California                        | 77 (10.3)                                        |
| Colorado                          | 31 (4.2)                                         |
| Connecticut                       | 9 (1.2)                                          |
| Delaware                          | 1 (0.1)                                          |
| District of Columbia              | 1 (0.1)                                          |
| Florida                           | 33 (4.4)                                         |
| Georgia                           | 25 (3.4)                                         |
| Hawaii                            | 1 (0.1)                                          |
| Idaho                             | 10 (1.3)                                         |
| Idaho + Wyoming                   | 3 (0.4)                                          |
| Illinois                          | 19 (2.5)                                         |
| Indiana                           | 18 (2.4)                                         |
| Iowa                              | 7 (0.9)                                          |
| Kansas                            | 7 (0.9)                                          |
| Kentucky                          | 10 (1.3)                                         |
| Louisiana                         | 8 (1.1)                                          |
| Maine                             | 9 (1.2)                                          |
| Maryland                          | 23 (3.1)                                         |
| Massachusetts                     | 23 (3.1)                                         |
| Michigan                          | 36 (4.8)                                         |
| Minnesota                         | 9 (1.2)                                          |
| Mississippi                       | 4 (0.5)                                          |
| Missouri                          | 22 (2.9)                                         |
| Montana                           | 1 (0.1)                                          |
| Nebraska                          | 3 (0.4)                                          |
| Nevada                            | 8 (0.7)                                          |
| New Hampshire                     | 5 (1.1)                                          |
| New Jersey                        | 17 (2.3)                                         |
| New Mexico                        | 11 (1.5)                                         |
| New York                          | 40 (5.4)                                         |
| North Carolina                    | 30 (4.0)                                         |
| North Dakota                      | 3 (0.4)                                          |
| Ohio                              | 29 (3.9)                                         |
| Oklahoma                          | 5 (0.7)                                          |
| Oregon                            | 6 (0.8)                                          |
| Pennsylvania                      | 33 (4.4)                                         |
| Rhode Island                      | 4 (0.5)                                          |
| South Carolina                    | 9 (1.2)                                          |
| South Dakota                      | 4 (0.5)                                          |
| Tennessee                         | 14 (1.9)                                         |
| Texas                             | 48 (6.4)                                         |
| Utah                              | 23 (3.1)                                         |
| Vermont                           | 6 (0.8)                                          |
| Virginia                          | 17 (2.3)                                         |
| Washington                        | 11 (1.5)                                         |
| West Virginia                     | 4 (0.5)                                          |
| Wisconsin                         | 10 (1.3)                                         |
| Wyoming                           | 1 (0.1)                                          |
| Unknown                           | 4                                                |
